# Supplementary material
Source: MDPI journal article supplement (https://www.mdpi.com/1424-2818/15/4/537)
Supplement: s1 [file s1]

### Supplementary materials

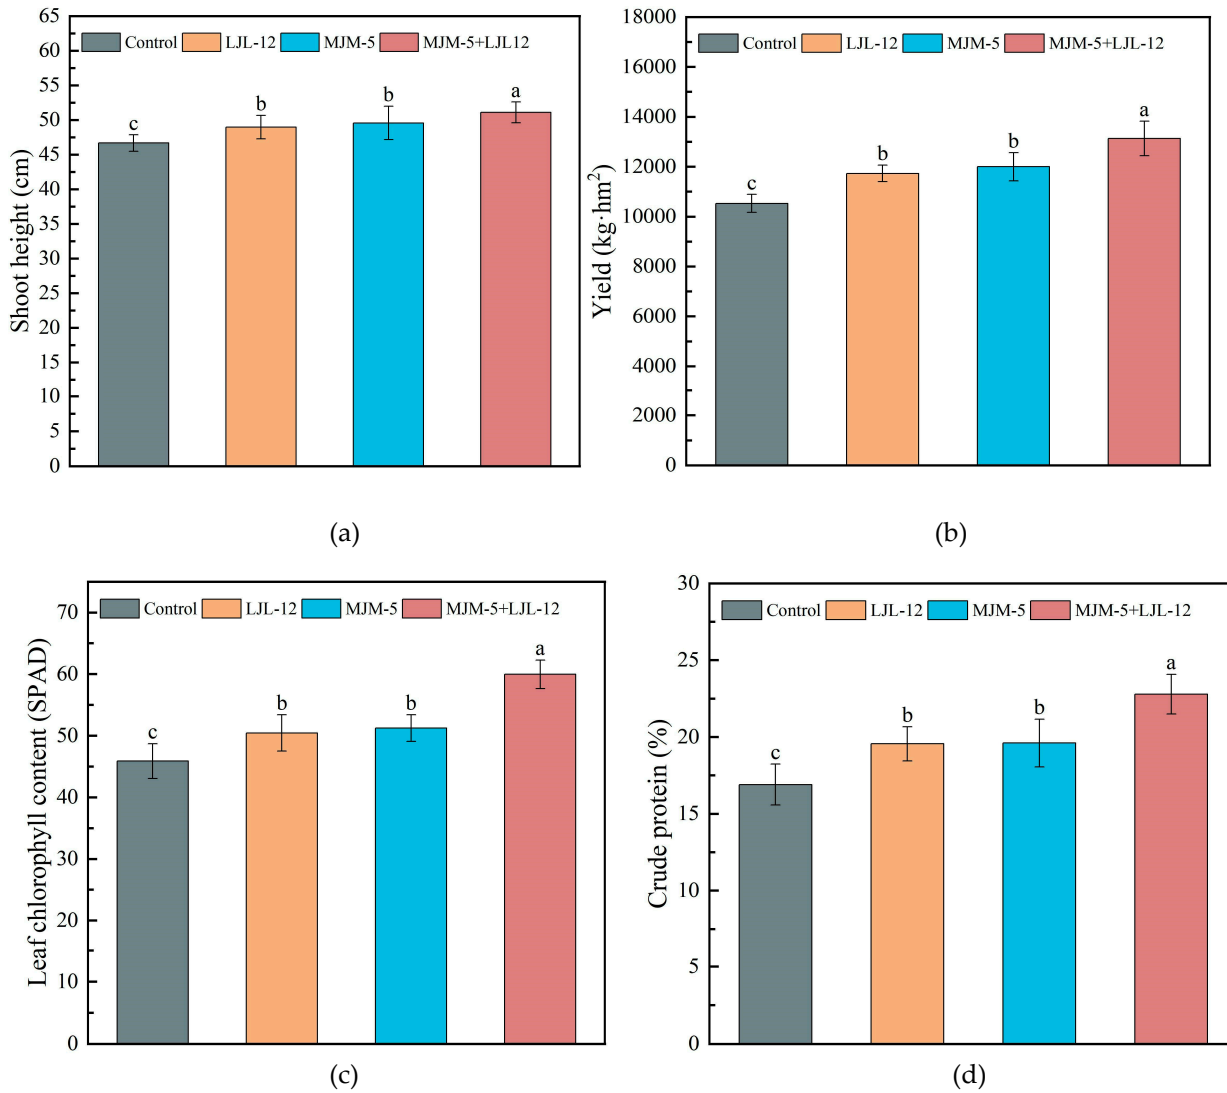

**Supplementary Figure S1.** Agronomic characteristics of alfalfa under Control, LJL-12, MJM-5, and MJM-5+LJL-12 treatments, including (a) shoot height, (b) yield, (c) leaf chlorophyll content, (d) crude protein. Lowercase letters indicate significant differences among the treatments ( $P < 0.05$ ).

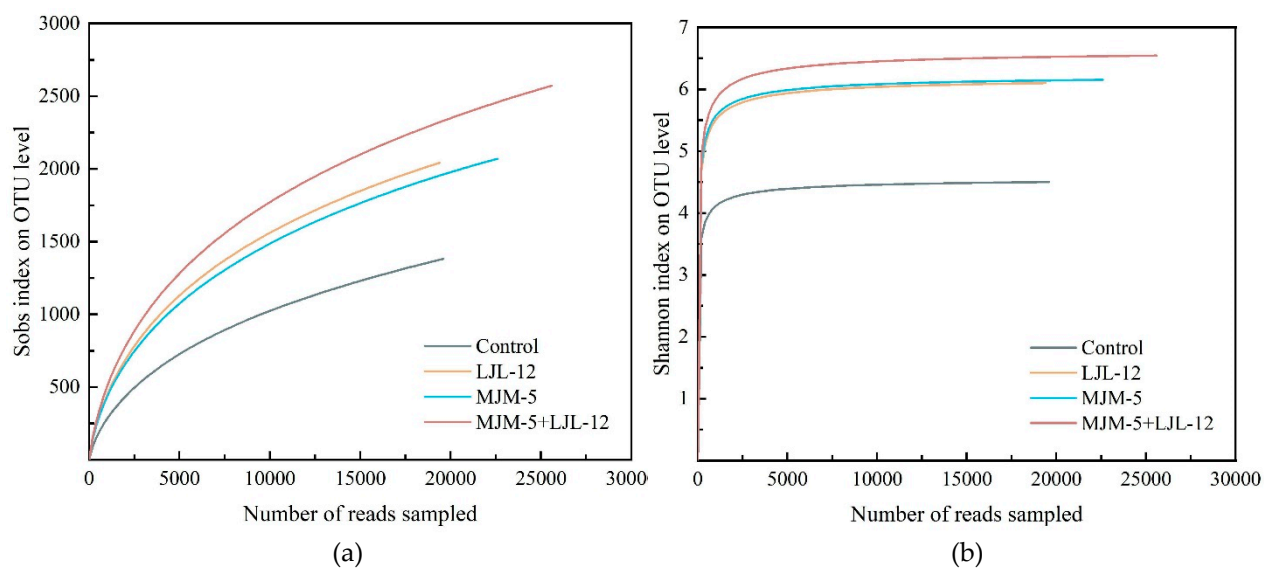

**Supplementary Figure S2.** Rarefaction curves of bacterial community in the rhizosphere of alfalfa under Control, LJL-12, MJM-5, and MJM-5+LJL-12 treatments, based on (a) Sobs and (b) Shannon indexes.

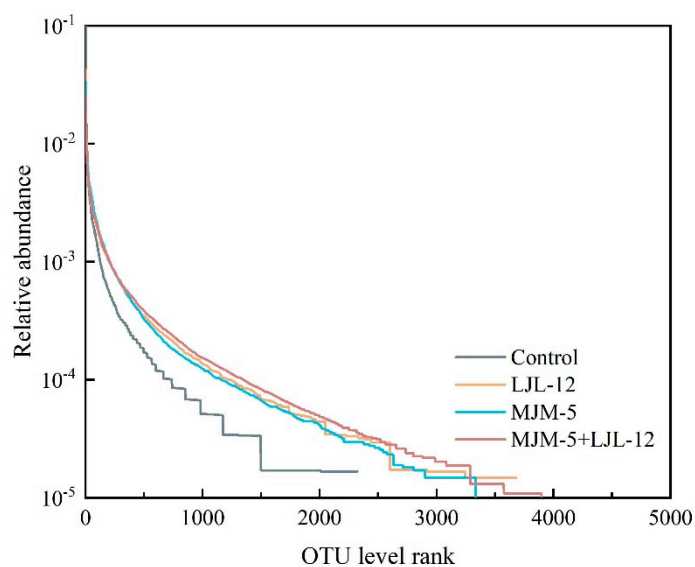

**Supplementary Figure S3.** Rank-abundances of bacterial community in the rhizosphere of alfalfa under Control, LJL-12, MJM-5, and MJM-5+LJL-12 treatments.

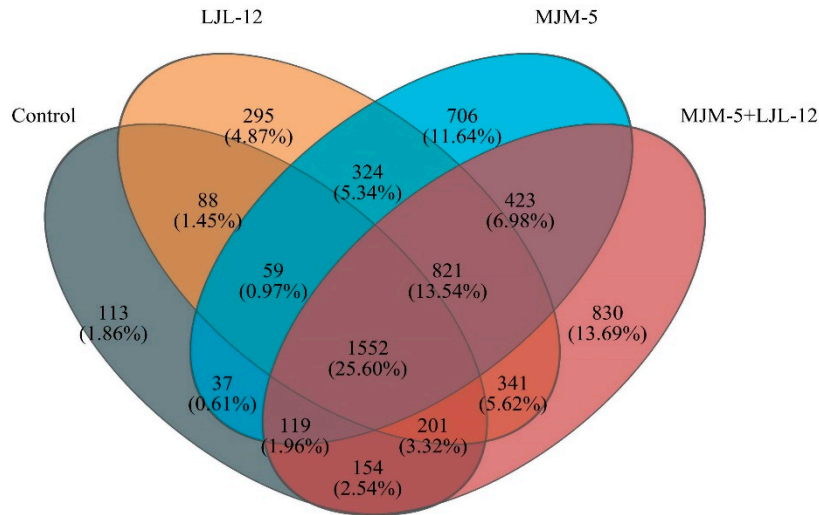

**Supplementary Figure S4.** Venn diagram of OTUs level of bacterial community in the rhizosphere of alfalfa under Control, LJL-12, MJM-5, and MJM-5+LJL-12 treatments. The figure shows the number of shared and unique OTUs and their relative percentage among treatments.

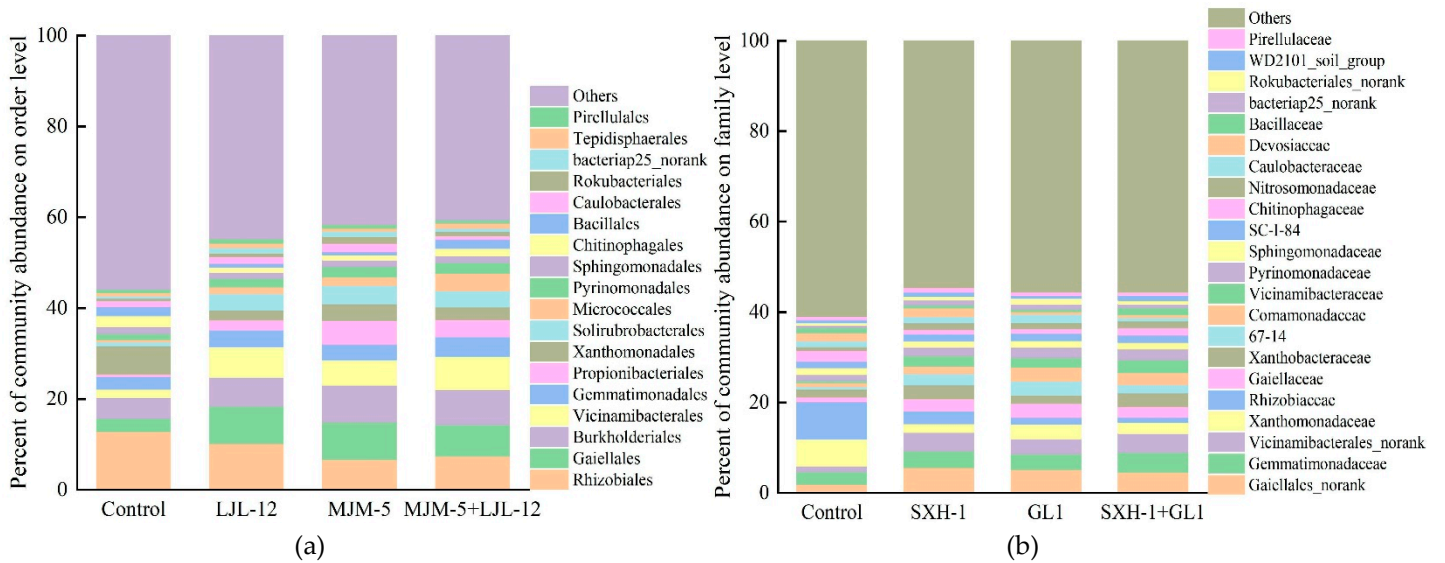

**Supplementary Figure S5.** Bacterial community composition in the rhizosphere of alfalfa under Control, LJL-12, MJM-5, and MJM-5+LJL-12 treatments at **(a)** the order (others: relative abundance < 0.5%) and **(b)** the family levels (others: relative abundance < 0.5%).

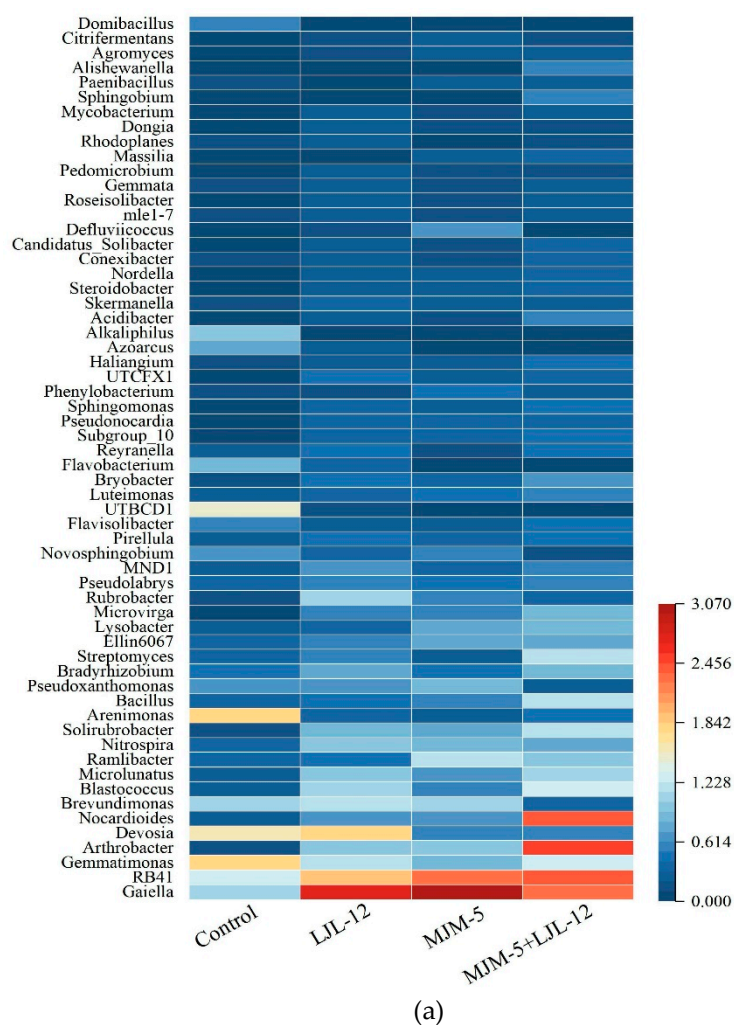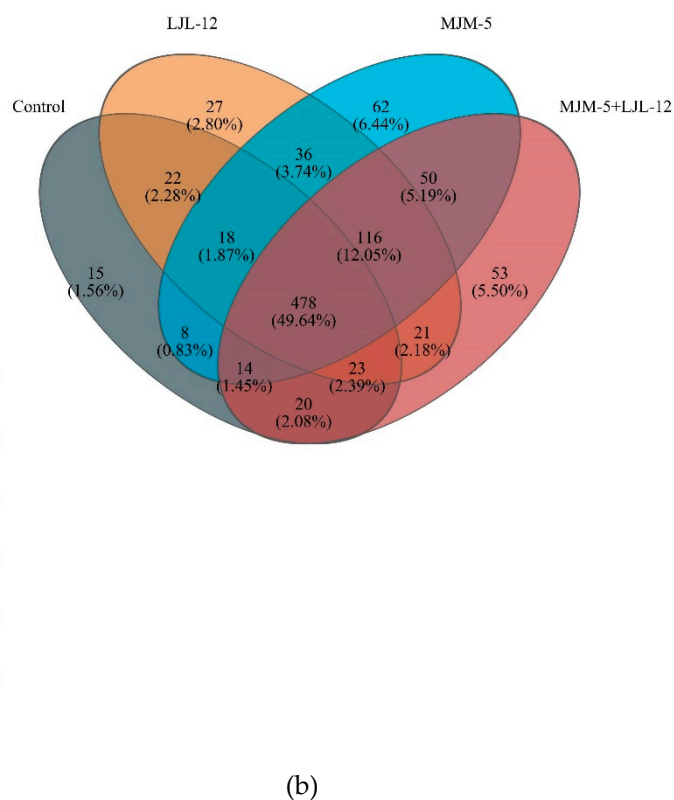

**Supplementary Figure S6. (a)** Top 60 bacterial genera in abundance of alfalfa rhizosphere under Control, LJJ-12, MJM-5, and MJM-5+LJJ-12 treatments. Different color boxes represent the relative abundance change of bacterial taxa. The color bar on the right of the heatmap shows the range of relative changes; **(b)** Venn diagram of bacterial genera in the rhizosphere of alfalfa. Different values in the Venn diagram represent the number and percentage of bacterial genera that were either shared or unique among treatments.

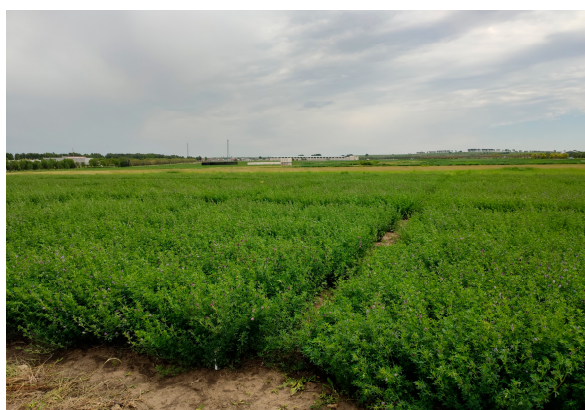

**Supplementary Figure S7.** Field experiment area of the alfalfa planting.

**Supplementary Table S1.** Relative abundance of bacterial phyla in the rhizosphere of alfalfa under Control, LJL-12, MJM-5, and MJM-5+LJL-12 treatments.

| <b>Taxon</b>          | <b>Relative abundance (%)</b> |               |              |                     |
|-----------------------|-------------------------------|---------------|--------------|---------------------|
| <b>Phylum</b>         | <b>Control</b>                | <b>LJL-12</b> | <b>MJM-5</b> | <b>MJM-5+LJL-12</b> |
| Proteobacteria        | 57.686                        | 29.134        | 27.809       | 26.952              |
| Actinobacteriota      | 7.377                         | 23.987        | 30.452       | 27.228              |
| Acidobacteriota       | 4.56                          | 12.145        | 12.384       | 14.633              |
| Chloroflexi           | 2.722                         | 8.523         | 7.048        | 8.312               |
| Gemmatimonadota       | 4.182                         | 4.402         | 4.055        | 4.737               |
| Bacteroidota          | 6.522                         | 2.591         | 2.855        | 2.854               |
| Firmicutes            | 7.174                         | 1.732         | 1.711        | 3.167               |
| Planctomycetota       | 2.307                         | 3.474         | 2.568        | 3.504               |
| Cyanobacteria         | 0.158                         | 5.401         | 3.318        | 0.503               |
| Myxococcota           | 0.812                         | 2.160         | 1.852        | 2.236               |
| Desulfobacterota      | 4.223                         | 1.577         | 0.837        | 0.414               |
| Methylomirabilota     | 0.525                         | 0.808         | 1.520        | 0.914               |
| Bacteria_unclassified | 0.412                         | 1.038         | 0.750        | 1.289               |
| Nitrospirota          | 0.351                         | 0.982         | 0.867        | 0.782               |
| Armatimonadota        | 0.427                         | 0.688         | 0.498        | 0.842               |
| Latescibacterota      | 0.117                         | 0.182         | 0.221        | 0.439               |
| Others                | 0.444                         | 1.175         | 1.257        | 1.194               |

**Supplementary Table S2.** Relative abundance of bacterial classes in the rhizosphere of alfalfa under Control, LJL-12, MJM-5, and MJM-5+LJL-12 treatments.

| <b>Taxon</b>          | <b>Relative abundance (%)</b> |               |              |                     |
|-----------------------|-------------------------------|---------------|--------------|---------------------|
| <b>Class</b>          | <b>Control</b>                | <b>LJL-12</b> | <b>MJM-5</b> | <b>MJM-5+LJL-12</b> |
| Gammaproteobacteria   | 39.159                        | 12.15         | 12.982       | 14.319              |
| Alphaproteobacteria   | 18.527                        | 16.978        | 14.819       | 12.631              |
| Thermoleophilia       | 3.886                         | 12.072        | 12.575       | 10.724              |
| Actinobacteria        | 2.625                         | 7.726         | 9.816        | 13.036              |
| Vicinamibacteria      | 1.883                         | 6.803         | 6.000        | 7.510               |
| Gemmatimonadetes      | 2.775                         | 3.763         | 3.532        | 4.361               |
| Bacteroidia           | 5.971                         | 2.326         | 2.600        | 2.723               |
| Blastocatellia        | 1.537                         | 2.499         | 2.970        | 3.145               |
| Chloroflexia          | 0.595                         | 3.175         | 1.950        | 2.674               |
| MB-A2-108             | 0.412                         | 1.260         | 3.698        | 1.426               |
| Planctomycetes        | 1.452                         | 2.282         | 1.719        | 2.143               |
| Bacilli               | 2.364                         | 1.043         | 0.984        | 2.462               |
| Acidobacteriae        | 0.655                         | 1.518         | 0.962        | 2.153               |
| KD4-96                | 0.489                         | 1.258         | 1.321        | 1.714               |
| Anaerolineae          | 0.444                         | 1.572         | 1.416        | 1.314               |
| Methylomirabilia      | 0.525                         | 0.808         | 1.520        | 0.914               |
| Phycisphaerae         | 0.806                         | 1.074         | 0.698        | 1.171               |
| bacteriap25           | 0.501                         | 1.176         | 1.125        | 0.766               |
| Bacteria_unclassified | 0.412                         | 1.038         | 0.750        | 1.289               |
| Others                | 14.985                        | 19.480        | 18.563       | 13.524              |

**Supplementary Table S3.** Relative abundance of bacterial orders in the rhizosphere of alfalfa under Control, LJL-12, MJM-5, and MJM-5+LJL-12 treatments.

| <b>Taxon</b>        | <b>Relative abundance (%)</b> |               |              |                     |
|---------------------|-------------------------------|---------------|--------------|---------------------|
| <b>Order</b>        | <b>Control</b>                | <b>LJL-12</b> | <b>MJM-5</b> | <b>MJM-5+LJL-12</b> |
| Rhizobiales         | 12.772                        | 10.137        | 6.657        | 7.365               |
| Gaiellales          | 2.968                         | 8.247         | 8.245        | 6.978               |
| Burkholderiales     | 4.559                         | 6.427         | 8.057        | 7.662               |
| Vicinamibacterales  | 1.832                         | 6.615         | 5.555        | 7.3                 |
| Gemmatimonadales    | 2.775                         | 3.763         | 3.532        | 4.361               |
| Propionibacterales  | 0.532                         | 2.128         | 5.206        | 3.79                |
| Xanthomonadales     | 6.217                         | 2.181         | 3.660        | 2.776               |
| Solirubrobacterales | 0.862                         | 3.689         | 4.066        | 3.566               |
| Micrococcales       | 0.553                         | 1.476         | 1.838        | 3.821               |
| Pyrinomonadales     | 1.302                         | 1.913         | 2.279        | 2.394               |
| Sphingomonadales    | 1.508                         | 1.305         | 1.470        | 1.470               |
| Chitinophagales     | 2.410                         | 1.123         | 1.137        | 1.654               |
| Bacillales          | 2.016                         | 0.859         | 0.702        | 1.985               |
| Caulobacterales     | 1.301                         | 1.434         | 1.871        | 0.741               |
| Rokubacterales      | 0.525                         | 0.804         | 1.508        | 0.912               |
| bacteriap25_norank  | 0.501                         | 1.176         | 1.125        | 0.766               |
| Tepidisphaerales    | 0.714                         | 1.003         | 0.626        | 1.134               |
| Pirellulales        | 0.766                         | 1.011         | 0.824        | 0.718               |
| Others              | 55.888                        | 44.708        | 41.640       | 40.605              |

**Supplementary Table S4.** Relative abundance of bacterial families in the rhizosphere of alfalfa under Control, LJL-12, MJM-5, and MJM-5+LJL-12 treatments.

| <b>Taxon</b>              | <b>Relative abundance (%)</b> |               |              |                     |
|---------------------------|-------------------------------|---------------|--------------|---------------------|
| <b>Family</b>             | <b>Control</b>                | <b>LJL-12</b> | <b>MJM-5</b> | <b>MJM-5+LJL-11</b> |
| Gaiellales_norank         | 1.857                         | 5.534         | 5.092        | 4.566               |
| Gemmatimonadaceae         | 2.775                         | 3.763         | 3.532        | 4.361               |
| Vicinamibacterales_norank | 1.275                         | 4.076         | 3.321        | 4.195               |
| Xanthomonadaceae          | 5.919                         | 1.933         | 3.249        | 2.419               |
| Rhizobiaceae              | 4.346                         | 6.781         | 7.488        | 9.121               |
| Gaiellaceae               | 1.077                         | 2.676         | 3.064        | 2.329               |
| Xanthobacteraceae         | 1.703                         | 3.073         | 1.875        | 2.975               |
| 67-14                     | 0.560                         | 2.537         | 3.112        | 1.862               |
| Comamonadaceae            | 0.809                         | 1.563         | 3.057        | 2.652               |
| Vicinamibacteraceae       | 0.524                         | 2.386         | 2.117        | 2.866               |
| Pyrinomonadaceae          | 1.302                         | 1.913         | 2.279        | 2.394               |
| Sphingomonadaceae         | 1.508                         | 1.305         | 1.470        | 1.470               |
| SC-I-84                   | 2.485                         | 1.584         | 1.654        | 1.639               |
| Chitinophagaceae          | 5.393                         | 1.013         | 1.005        | 1.536               |
| Nitrosomonadaceae         | 0.782                         | 1.417         | 1.296        | 1.534               |
| Caulobacteraceae          | 1.294                         | 1.429         | 1.869        | 0.740               |
| Devosiaceae               | 5.751                         | 1.865         | 0.594        | 0.610               |
| Bacillaceae               | 1.201                         | 0.681         | 0.541        | 1.406               |
| bacteriap25_norank        | 6.501                         | 1.176         | 1.025        | 0.066               |
| Rokubacterales_norank     | 0.517                         | 0.734         | 1.262        | 0.837               |

|                   |        |        |        |        |
|-------------------|--------|--------|--------|--------|
| WD2101_soil_group | 0.700  | 0.963  | 0.611  | 1.092  |
| Pirellulaceae     | 0.766  | 1.011  | 0.024  | 0.718  |
| Others            | 50.956 | 50.588 | 50.562 | 48.621 |

**Supplementary Table S5.** Some unique bacterial genera in the rhizosphere of alfalfa under LJL-12, MJM-5, and MJM-5+LJL-12 treatments.

| Taxa                              | LJL-12 | Taxa                           | MJM-5 | Taxa                            | MJM-5+LJL-12 |
|-----------------------------------|--------|--------------------------------|-------|---------------------------------|--------------|
| Derxia                            | 0.032  | Oscillatoria_PCC-6304          | 0.999 | Acinetobacter                   | 0.061        |
| Aquiflexum                        | 0.031  | Lentimicrobium                 | 0.012 | Mumia                           | 0.014        |
| Deferrisoma                       | 0.027  | BSV13                          | 0.010 | MM2                             | 0.010        |
| CK06-06-Mud-MAS4B-21              | 0.003  | Candidatus_Methyloirab<br>ilis | 0.009 | Paludibacter                    | 0.009        |
| Desulfovira                       | 0.003  | Pseudofulvimonas               | 0.008 | E1B-B3-114                      | 0.006        |
| Microcoleus_Es-Yyy1400            | 0.003  | Methylobacter                  | 0.007 | Kouleothrix                     | 0.005        |
| 1174-901-12                       | 0.002  | Pleomorphomonas                | 0.006 | Saccharothrix                   | 0.005        |
| Anaerocolumna                     | 0.002  | Rubritepida                    | 0.005 | OM60NOR5_clade                  | 0.004        |
| DEV114                            | 0.002  | Tagaea                         | 0.005 | Jeongeupia                      | 0.004        |
| Parvibium                         | 0.002  | Hydrocarboniphaga              | 0.004 | Nostoc_PCC-73102                | 0.003        |
| Phormidium_SAG_37.90              | 0.002  | Nibrella                       | 0.004 | Clostridium_sensu_stric<br>to_6 | 0.003        |
| Microseira_Carmichael-<br>Alabama | 0.001  | Pelagibius                     | 0.004 | Deinococcus                     | 0.003        |
| Crocinitomix                      | 0.001  | Oscillatoria                   | 0.003 | Desulfitobacterium              | 0.002        |
| Leadbetterella                    | 0.001  | Candidatus_Glomeribacter       | 0.003 | Aneurinibacillus                | 0.002        |
| SWB02                             | 0.001  | Isosphaera                     | 0.002 | Sphingobacterium                | 0.002        |
| Propionivibrio                    | 0.001  | Anaerosinus                    | 0.002 | Endomicrobium                   | 0.001        |

**Supplementary Table S6.** LEfSe analysis of bacterial community in the rhizosphere of alfalfa under Control and LJL-12 treatments and the bacterial taxa were significantly enriched in the LJL-12 treatment.

| Species                                   | Mean  | LDA value | P value |
|-------------------------------------------|-------|-----------|---------|
| p__Actinobacteriota                       | 5.380 | 4.906     | 0.0495  |
| c__Thermoleophilia                        | 5.082 | 4.579     | 0.0495  |
| p__Acidobacteriota                        | 5.084 | 4.565     | 0.0495  |
| p__Chloroflexi                            | 4.931 | 4.491     | 0.0495  |
| o__Gaiellales                             | 4.916 | 4.412     | 0.0495  |
| c__Actinobacteria                         | 4.888 | 4.399     | 0.0495  |
| c__Vicinamibacteria                       | 4.833 | 4.380     | 0.0495  |
| o__Vicinamibacterales                     | 4.821 | 4.367     | 0.0495  |
| g__norank_f__norank_o__Gaiellales         | 4.743 | 4.236     | 0.0495  |
| f__norank_o__Gaiellales                   | 4.743 | 4.226     | 0.0495  |
| f__norank_o__Vicinamibacterales           | 4.610 | 4.145     | 0.0495  |
| g__norank_f__norank_o__Vicinamibacterales | 4.610 | 4.133     | 0.0495  |
| c__Chloroflexia                           | 4.502 | 4.131     | 0.0495  |
| o__Solirubrobacterales                    | 4.567 | 4.109     | 0.0495  |
| f__Vicinamibacteraceae                    | 4.378 | 3.927     | 0.0495  |
| f__67-14                                  | 4.404 | 3.904     | 0.0495  |
| g__norank_f__67-14                        | 4.404 | 3.895     | 0.0495  |

|                                              |       |       |        |
|----------------------------------------------|-------|-------|--------|
| f__Gaiellaceae                               | 4.427 | 3.882 | 0.0495 |
| g__norank_f__Vicinamibacteraceae             | 4.289 | 3.856 | 0.0495 |
| g__norank_f__Gemmatimonadaceae               | 4.309 | 3.855 | 0.0495 |
| o__Propionibacteriales                       | 4.328 | 3.854 | 0.0495 |
| g__Gaiella                                   | 4.427 | 3.854 | 0.0495 |
| c__Acidimicrobiia                            | 4.263 | 3.829 | 0.0495 |
| o__Frankiales                                | 4.248 | 3.797 | 0.0495 |
| p__Myxococcota                               | 4.334 | 3.790 | 0.0495 |
| c__Anaerolineae                              | 4.196 | 3.758 | 0.0495 |
| o__Thermomicrobiales                         | 4.177 | 3.749 | 0.0495 |
| p__Planctomycetota                           | 4.541 | 3.726 | 0.0495 |
| g__Arthrobacter                              | 4.000 | 3.672 | 0.0495 |
| o__Microtrichales                            | 4.075 | 3.670 | 0.0495 |
| f__Micrococcaceae                            | 4.018 | 3.669 | 0.0495 |
| g__norank_f__AKIW781                         | 3.838 | 3.668 | 0.0495 |
| f__Propionibacteriaceae                      | 4.116 | 3.663 | 0.0495 |
| f__AKIW781                                   | 3.838 | 3.656 | 0.0495 |
| o__Rubrobacterales                           | 4.029 | 3.643 | 0.0495 |
| o__Kallotenuales                             | 3.838 | 3.642 | 0.0495 |
| f__JG30-KF-CM45                              | 4.115 | 3.640 | 0.0495 |
| g__norank_f__JG30-KF-CM45                    | 4.115 | 3.630 | 0.0495 |
| g__Rubrobacter                               | 4.029 | 3.626 | 0.0495 |
| o__Chloroflexales                            | 3.992 | 3.621 | 0.0495 |
| f__Rubrobacteriaceae                         | 4.029 | 3.618 | 0.0495 |
| c__Rubrobacteria                             | 4.029 | 3.595 | 0.0495 |
| f__Geodermatophilaceae                       | 4.077 | 3.594 | 0.0495 |
| o__norank_c__MB-A2-108                       | 4.100 | 3.593 | 0.0495 |
| g__norank_f__Roseiflexaceae                  | 3.945 | 3.584 | 0.0495 |
| c__MB-A2-108                                 | 4.100 | 3.576 | 0.0495 |
| f__Roseiflexaceae                            | 3.954 | 3.569 | 0.0495 |
| f__norank_o__norank_c__KD4-96                | 4.100 | 3.539 | 0.0495 |
| f__Nitrosomonadaceae                         | 4.151 | 3.568 | 0.0495 |
| c__Nitrospira                                | 3.991 | 3.566 | 0.0495 |
| f__Solirubrobacteraceae                      | 4.048 | 3.562 | 0.0495 |
| c__Planctomycetes                            | 4.358 | 3.556 | 0.0495 |
| g__Blastococcus                              | 4.040 | 3.553 | 0.0495 |
| f__Anaerolineaceae                           | 3.921 | 3.552 | 0.0495 |
| f__norank_o__norank_c__MB-A2-108             | 4.100 | 3.550 | 0.0495 |
| g__norank_f__norank_o__norank_c__MB-A2-108   | 4.100 | 3.548 | 0.0495 |
| p__Nitrospirota                              | 3.992 | 3.547 | 0.0495 |
| f__norank_o__norank_c__KD4-96                | 4.100 | 3.539 | 0.0495 |
| g__norank_f__norank_o__norank_c__KD4-96      | 4.100 | 3.532 | 0.0495 |
| c__KD4-96                                    | 4.100 | 3.532 | 0.0495 |
| o__Nitrospirales                             | 3.991 | 3.528 | 0.0495 |
| g__Microlunatus                              | 4.000 | 3.524 | 0.0495 |
| o__Anaerolineales                            | 3.921 | 3.524 | 0.0495 |
| g__Nitrospira                                | 3.991 | 3.520 | 0.0495 |
| f__Nitrospiraceae                            | 3.991 | 3.519 | 0.0495 |
| c__bacteriap25                               | 4.071 | 3.503 | 0.0495 |
| c__TK10                                      | 3.921 | 3.496 | 0.0495 |
| g__norank_f__norank_o__norank_c__bacteriap25 | 4.071 | 3.494 | 0.0495 |
| f__norank_o__norank_c__bacteriap25           | 4.071 | 3.485 | 0.0495 |



|                                        |       |       |        |
|----------------------------------------|-------|-------|--------|
| g__unclassified_k__norank_d__Bacteria  | 4.016 | 3.474 | 0.0495 |
| p__unclassified_k__norank_d__Bacteria  | 4.016 | 3.473 | 0.0495 |
| o__norank_c__bacteriap25               | 4.071 | 3.473 | 0.0495 |
| o__norank_c__TK10                      | 3.921 | 3.471 | 0.0495 |
| g__Solirubrobacter                     | 3.923 | 3.470 | 0.0495 |
| g__norank_f__norank_o__norank_c__TK10  | 3.921 | 3.460 | 0.0495 |
| o__unclassified_k__norank_d__Bacteria  | 4.016 | 3.435 | 0.0495 |
| f__norank_o__norank_c__TK10            | 3.921 | 3.428 | 0.0495 |
| f__unclassified_k__norank_d__Bacteria  | 4.016 | 3.424 | 0.0495 |
| f__Ilumatobacteraceae                  | 3.803 | 3.402 | 0.0495 |
| f__Nocardioideaceae                    | 3.915 | 3.398 | 0.0495 |
| c__unclassified_k__norank_d__Bacteria  | 4.016 | 3.396 | 0.0495 |
| f__Beijerinckiaceae                    | 3.990 | 3.390 | 0.0495 |
| g__norank_f__Xanthobacteraceae         | 4.005 | 3.361 | 0.0495 |
| g__Clostridium_sensu_stricto_12        | 1.919 | 3.353 | 0.0369 |
| c__Polyangia                           | 3.793 | 3.340 | 0.0495 |
| g__Bryobacter                          | 3.680 | 3.329 | 0.0495 |
| g__Nocardioideae                       | 3.832 | 3.325 | 0.0495 |
| o__Bryobacteriales                     | 3.680 | 3.316 | 0.0495 |
| f__Bryobacteraceae                     | 3.680 | 3.316 | 0.0495 |
| g__Microvirga                          | 3.740 | 3.302 | 0.0495 |
| f__norank_o__Subgroup_7                | 3.780 | 3.296 | 0.0495 |
| o__Azospirillales                      | 3.835 | 3.262 | 0.0495 |
| g__UTCFX1                              | 3.640 | 3.261 | 0.0495 |
| o__Subgroup_7                          | 3.780 | 3.239 | 0.0495 |
| c__Holophagae                          | 3.780 | 3.230 | 0.0495 |
| f__norank_o__IMCC26256                 | 3.701 | 3.227 | 0.0495 |
| g__unclassified_f__Vicinamibacteraceae | 3.618 | 3.223 | 0.0495 |
| o__IMCC26256                           | 3.701 | 3.220 | 0.0495 |
| p__Verrucomicrobiota                   | 3.560 | 3.216 | 0.0495 |
| c__Verrucomicrobiae                    | 3.553 | 3.214 | 0.0495 |
| o__Gemmatales                          | 3.843 | 3.208 | 0.0495 |
| g__norank_f__norank_o__Subgroup_7      | 3.780 | 3.208 | 0.0495 |
| o__Micromonosporales                   | 3.831 | 3.204 | 0.0495 |
| g__norank_f__norank_o__Microtrichales  | 3.597 | 3.200 | 0.0495 |
| f__Gemmataceae                         | 3.843 | 3.198 | 0.0495 |
| g__Sphingomonas                        | 3.570 | 3.191 | 0.0495 |
| g__norank_f__Ilumatobacteraceae        | 3.621 | 3.188 | 0.0495 |
| f__Micromonosporaceae                  | 3.831 | 3.175 | 0.0495 |
| g__norank_f__WD2101_soil_group         | 3.984 | 3.175 | 0.0495 |
| o__Thermoanaerobaculales               | 3.525 | 3.174 | 0.0495 |
| f__Pseudonocardiaceae                  | 3.695 | 3.169 | 0.0495 |
| g__MND1                                | 3.805 | 3.168 | 0.0495 |
| g__norank_f__norank_o__IMCC26256       | 3.701 | 3.164 | 0.0495 |
| f__Thermoanaerobaculaceae              | 3.525 | 3.163 | 0.0495 |
| f__Steroidobacteraceae                 | 3.567 | 3.163 | 0.0495 |
| g__Subgroup_10                         | 3.525 | 3.162 | 0.0495 |
| o__Pseudonocardiales                   | 3.695 | 3.160 | 0.0495 |
| g__Pirellula                           | 3.706 | 3.157 | 0.0495 |
| o__Blastocatellales                    | 3.589 | 3.148 | 0.0495 |
| o__Steroidobacterales                  | 3.570 | 3.136 | 0.0495 |
| c__Thermoanaerobaculia                 | 3.525 | 3.134 | 0.0495 |

|                                              |       |       |        |
|----------------------------------------------|-------|-------|--------|
| f__norank_o__Microtrichales                  | 3.597 | 3.133 | 0.0495 |
| o__Opitutales                                | 3.363 | 3.129 | 0.0495 |
| o__Tepidisphaerales                          | 4.002 | 3.127 | 0.0495 |
| f__Blastocatellaceae                         | 3.589 | 3.125 | 0.0495 |
| f__norank_o__norank_c__Gitt-GS-136           | 3.674 | 3.120 | 0.0495 |
| g__norank_f__norank_o__C0119                 | 3.504 | 3.115 | 0.0495 |
| f__norank_o__C0119                           | 3.504 | 3.102 | 0.0495 |
| o__Solibacterales                            | 3.339 | 3.091 | 0.0495 |
| o__C0119                                     | 3.504 | 3.088 | 0.0495 |
| f__TRA3-20                                   | 3.572 | 3.086 | 0.0495 |
| o__Caldilineales                             | 3.501 | 3.085 | 0.0495 |
| g__Pseudonocardia                            | 3.607 | 3.081 | 0.0495 |
| f__Caldilineaceae                            | 3.501 | 3.073 | 0.0495 |
| g__Candidatus_Solibacter                     | 3.339 | 3.070 | 0.0495 |
| f__norank_o__OPB41                           | 2.181 | 3.069 | 0.0369 |
| f__Opitutaceae                               | 3.363 | 3.068 | 0.0495 |
| g__norank_f__TRA3-20                         | 3.572 | 3.067 | 0.0495 |
| g__norank_f__norank_o__norank_c__Gitt-GS-136 | 3.674 | 3.062 | 0.0495 |
| f__Methylogiellaceae                         | 3.538 | 3.049 | 0.0495 |
| f__WD2101_soil_group                         | 3.984 | 3.047 | 0.0495 |
| o__norank_c__Gitt-GS-136                     | 3.674 | 3.045 | 0.0495 |
| c__Gitt-GS-136                               | 3.674 | 3.041 | 0.0495 |
| f__Solibacteraceae                           | 3.339 | 3.041 | 0.0495 |
| g__Opitutus                                  | 3.286 | 3.040 | 0.0495 |
| o__Myxococcales                              | 3.558 | 3.033 | 0.0495 |
| g__norank_f__norank_o__Azospirillales        | 3.478 | 3.013 | 0.0495 |
| g__Synechococcus_IR11                        | 3.179 | 3.013 | 0.0369 |
| g__Ohtaekwangia                              | 2.617 | 3.007 | 0.0369 |
| g__Pir4_lineage                              | 3.426 | 3.007 | 0.0495 |
| f__norank_o__Azospirillales                  | 3.478 | 3.005 | 0.0495 |

**Supplementary Table S7.** LEfSe analysis of bacterial community in the rhizosphere of alfalfa under Control and MJM-5 treatments and the bacterial taxa were significantly enriched in the MJM-5 treatment.

| Species                               | Mean  | LDA value | P value |
|---------------------------------------|-------|-----------|---------|
| p__unclassified_k__norank_d__Bacteria | 3.875 | 3.257     | 0.0495  |
| c__Acidimicrobiia                     | 4.575 | 4.232     | 0.0495  |
| o__Defluviicoccales                   | 3.804 | 3.542     | 0.0495  |
| f__norank_o__Gaiellales               | 4.707 | 4.235     | 0.0495  |
| p__Methyloirabilota                   | 4.182 | 3.719     | 0.0495  |
| f__Nocardioidaceae                    | 4.066 | 3.587     | 0.0495  |
| f__Gaiellaceae                        | 4.486 | 3.956     | 0.0495  |
| o__norank_c__Gitt-GS-136              | 3.925 | 3.487     | 0.0495  |
| f__Geminicoccaceae                    | 4.318 | 3.965     | 0.0495  |
| c__Chloroflexia                       | 4.290 | 3.817     | 0.0495  |
| c__Anaerolineae                       | 4.151 | 3.654     | 0.0495  |
| o__Nitrospirales                      | 3.926 | 3.386     | 0.0495  |
| c__Polyangia                          | 3.655 | 3.139     | 0.0495  |
| o__Solirubrobacterales                | 4.609 | 4.201     | 0.0495  |
| o__Anaerolineales                     | 3.945 | 3.599     | 0.0495  |
| g__norank_f__Gemmatimonadaceae        | 4.300 | 3.843     | 0.0495  |

|                                              |       |       |        |
|----------------------------------------------|-------|-------|--------|
| f__Anaerolineaceae                           | 3.945 | 3.618 | 0.0495 |
| f__norank_o__norank_c__bacteriap25           | 4.051 | 3.545 | 0.0495 |
| f__norank_o__Vicinamibacterales              | 4.521 | 4.054 | 0.0495 |
| p__Cyanobacteria                             | 4.521 | 4.097 | 0.0495 |
| g__norank_f__Gimesiaceae                     | 2.022 | 3.280 | 0.0369 |
| f__Blastocatellaceae                         | 3.682 | 3.264 | 0.0495 |
| o__Rubrobacterales                           | 3.747 | 3.336 | 0.0495 |
| f__norank_o__Subgroup_7                      | 4.205 | 3.856 | 0.0495 |
| c__MB-A2-108                                 | 4.568 | 4.214 | 0.0495 |
| g__Massilia                                  | 3.470 | 3.156 | 0.0495 |
| f__Steroidobacteraceae                       | 3.692 | 3.314 | 0.0495 |
| f__Latescibacteraceae                        | 2.096 | 3.351 | 0.0369 |
| o__Thermomicrobiales                         | 3.936 | 3.342 | 0.0495 |
| f__Defluviicoccaceae                         | 3.797 | 3.484 | 0.0495 |
| f__Oxalobacteraceae                          | 3.886 | 3.492 | 0.0495 |
| f__Rubrobacteriaceae                         | 3.747 | 3.334 | 0.0495 |
| o__Subgroup_17                               | 3.645 | 3.299 | 0.0495 |
| g__unclassified_f__Propionibacteriaceae      | 4.525 | 4.197 | 0.0369 |
| f__norank_o__norank_c__norank_p__MBNT15      | 3.444 | 3.078 | 0.0495 |
| c__Actinobacteria                            | 4.992 | 4.501 | 0.0495 |
| o__Thermosynechococcales                     | 3.524 | 3.104 | 0.0369 |
| c__Nitrospiria                               | 3.926 | 3.431 | 0.0495 |
| g__Subgroup_10                               | 3.593 | 3.132 | 0.0495 |
| c__unclassified_k__norank_d__Bacteria        | 3.875 | 3.233 | 0.0495 |
| g__norank_f__Geminicoccaceae                 | 4.298 | 3.978 | 0.0495 |
| f__WX65                                      | 3.391 | 3.066 | 0.0495 |
| g__Noviherbaspirillum                        | 3.363 | 3.012 | 0.0495 |
| f__Solirubrobacteraceae                      | 3.967 | 3.472 | 0.0495 |
| f__Methyloiligellaceae                       | 3.831 | 3.450 | 0.0495 |
| g__norank_f__norank_o__Vicinamibacterales    | 4.521 | 4.038 | 0.0495 |
| g__Synechococcus_IR11                        | 3.524 | 3.132 | 0.0369 |
| f__Microbacteriaceae                         | 3.757 | 3.404 | 0.0495 |
| c__Methyloirabilia                           | 4.182 | 3.687 | 0.0495 |
| c__Rubrobacteria                             | 3.747 | 3.331 | 0.0495 |
| g__norank_f__norank_o__norank_c__Gitt-GS-136 | 3.925 | 3.502 | 0.0495 |
| p__Actinobacteriota                          | 5.484 | 5.043 | 0.0495 |
| o__norank_c__norank_p__MBNT15                | 3.444 | 3.119 | 0.0495 |
| g__norank_f__norank_o__Actinomarinales       | 3.538 | 3.256 | 0.0463 |
| c__Thermoleophilia                           | 5.100 | 4.600 | 0.0495 |
| f__JG30-KF-CM45                              | 3.881 | 3.314 | 0.0495 |
| p__Chloroflexi                               | 4.848 | 4.342 | 0.0495 |
| o__Thermoanaerobaculales                     | 3.593 | 3.116 | 0.0495 |
| o__Vicinamibacterales                        | 4.745 | 4.278 | 0.0495 |
| f__unclassified_o__Cyanobacteriales          | 3.984 | 3.571 | 0.0369 |
| g__norank_f__norank_o__Rokubacteriales       | 4.101 | 3.577 | 0.0495 |
| o__Microtrichales                            | 4.401 | 4.070 | 0.0495 |
| g__Solirubrobacter                           | 3.878 | 3.453 | 0.0495 |
| g__norank_f__norank_o__Gaiellales            | 4.707 | 4.221 | 0.0495 |
| g__Microvirga                                | 3.770 | 3.333 | 0.0495 |
| p__Myxococcota                               | 4.268 | 3.714 | 0.0495 |
| c__bacteriap25                               | 4.051 | 3.493 | 0.0495 |
| g__norank_f__Methyloiligellaceae             | 3.822 | 3.452 | 0.0495 |

|                                                   |       |       |        |
|---------------------------------------------------|-------|-------|--------|
| g__norank_f__norank_o__norank_c__MB-A2-108        | 4.568 | 4.182 | 0.0495 |
| c__Thermoanaerobaculia                            | 3.593 | 3.190 | 0.0495 |
| o__norank_c__KD4-96                               | 4.121 | 3.658 | 0.0495 |
| p__Acidobacteriota                                | 5.093 | 4.636 | 0.0495 |
| p__Nitrospirota                                   | 3.938 | 3.472 | 0.0495 |
| o__Propionibacteriales                            | 4.717 | 4.369 | 0.0495 |
| g__norank_f__Sutterellaceae                       | 3.619 | 3.281 | 0.0495 |
| g__norank_f__norank_o__IMCC26256                  | 3.877 | 3.433 | 0.0495 |
| g__norank_f__norank_o__norank_c__bacteriap25      | 4.051 | 3.512 | 0.0495 |
| f__Micrococcaceae                                 | 4.035 | 3.591 | 0.0495 |
| o__IMCC26256                                      | 3.877 | 3.439 | 0.0495 |
| f__norank_o__norank_c__KD4-96                     | 4.121 | 3.651 | 0.0495 |
| f__Comamonadaceae                                 | 4.485 | 4.058 | 0.0495 |
| g__norank_f__norank_o__norank_c__norank_p__MBNT15 | 3.444 | 3.120 | 0.0495 |
| o__Blastocatellales                               | 3.682 | 3.260 | 0.0495 |
| f__Sutterellaceae                                 | 3.619 | 3.314 | 0.0495 |
| g__norank_f__Vicinamibacteraceae                  | 4.221 | 3.796 | 0.0495 |
| f__Vicinamibacteraceae                            | 4.326 | 3.908 | 0.0495 |
| f__Ilumatobacteraceae                             | 3.703 | 3.345 | 0.0495 |
| g__Rubrobacter                                    | 3.747 | 3.308 | 0.0495 |
| o__norank_c__MB-A2-108                            | 4.568 | 4.186 | 0.0495 |
| g__norank_f__WX65                                 | 3.391 | 3.057 | 0.0495 |
| f__unclassified_k__norank_d__Bacteria             | 3.875 | 3.232 | 0.0495 |
| g__unclassified_k__norank_d__Bacteria             | 3.875 | 3.270 | 0.0495 |
| c__Gitt-GS-136                                    | 3.925 | 3.522 | 0.0495 |
| g__Fluviicola                                     | 3.421 | 3.164 | 0.0369 |
| p__MBNT15                                         | 3.444 | 3.118 | 0.0495 |
| o__Steroidobacterales                             | 3.697 | 3.339 | 0.0495 |
| f__norank_o__Microtrichales                       | 4.275 | 3.960 | 0.0495 |
| g__UTCFX1                                         | 3.406 | 3.009 | 0.0495 |
| g__norank_f__norank_o__Subgroup_7                 | 4.205 | 3.859 | 0.0495 |
| g__norank_f__Anaerolineaceae                      | 3.690 | 3.355 | 0.0495 |
| f__Nitrospiraceae                                 | 3.926 | 3.403 | 0.0495 |
| g__unclassified_o__Cyanobacteriales               | 3.984 | 3.611 | 0.0369 |
| g__Defluviicoccus                                 | 3.797 | 3.525 | 0.0495 |
| g__Microlunatus                                   | 3.837 | 3.348 | 0.0495 |
| o__Gaiellales                                     | 4.916 | 4.444 | 0.0495 |
| o__norank_c__bacteriap25                          | 4.051 | 3.486 | 0.0495 |
| f__Thermosynechococcaceae                         | 3.524 | 3.157 | 0.0369 |
| g__norank_f__67-14                                | 4.493 | 4.082 | 0.0495 |
| g__Steroidobacter                                 | 3.409 | 3.001 | 0.0495 |
| g__unclassified_f__Gemmatimonadaceae              | 3.631 | 3.227 | 0.0495 |
| o__unclassified_k__norank_d__Bacteria             | 3.875 | 3.192 | 0.0495 |
| o__Rokubacteriales                                | 4.178 | 3.673 | 0.0495 |
| c__KD4-96                                         | 4.121 | 3.638 | 0.0495 |
| o__Subgroup_7                                     | 4.205 | 3.847 | 0.0495 |
| o__Cyanobacteriales                               | 4.398 | 4.001 | 0.0495 |
| c__norank_p__MBNT15                               | 3.444 | 3.116 | 0.0495 |
| g__Ramlibacter                                    | 4.076 | 3.606 | 0.0495 |
| o__Actinomarinales                                | 3.538 | 3.223 | 0.0463 |
| f__Propionibacteriaceae                           | 4.607 | 4.254 | 0.0495 |
| f__norank_o__Actinomarinales                      | 3.538 | 3.189 | 0.0463 |

|                                         |       |       |        |
|-----------------------------------------|-------|-------|--------|
| f__norank_o__Subgroup_17                | 3.645 | 3.293 | 0.0495 |
| f__norank_o__norank_c__MB-A2-108        | 4.568 | 4.198 | 0.0495 |
| g__unclassified_f__Comamonadaceae       | 4.180 | 3.775 | 0.0495 |
| c__Holophagae                           | 4.206 | 3.853 | 0.0495 |
| g__Gaiella                              | 4.486 | 3.985 | 0.0495 |
| g__Nitrospira                           | 3.926 | 3.432 | 0.0495 |
| o__Tistrellales                         | 4.318 | 3.975 | 0.0495 |
| f__Hyphomicrobiaceae                    | 3.669 | 3.094 | 0.0495 |
| f__norank_o__IMCC26256                  | 3.877 | 3.443 | 0.0495 |
| f__norank_o__Rokubacteriales            | 4.101 | 3.596 | 0.0495 |
| g__Arthrobacter                         | 3.998 | 3.598 | 0.0495 |
| f__norank_o__norank_c__Gitt-GS-136      | 3.925 | 3.497 | 0.0495 |
| g__norank_f__norank_o__norank_c__KD4-96 | 4.121 | 3.617 | 0.0495 |
| g__Agromyces                            | 3.421 | 3.083 | 0.0495 |
| g__norank_f__norank_o__Subgroup_17      | 3.645 | 3.305 | 0.0495 |
| g__Lysobacter                           | 3.886 | 3.457 | 0.0495 |
| g__unclassified_f__Vicinamibacteraceae  | 3.569 | 3.168 | 0.0495 |
| g__norank_f__Ilumatobacteraceae         | 3.573 | 3.199 | 0.0495 |
| g__norank_f__norank_o__Microtrichales   | 4.275 | 3.943 | 0.0495 |
| f__67-14                                | 4.493 | 4.102 | 0.0495 |
| f__Thermoanaerobaculaceae               | 3.593 | 3.165 | 0.0495 |
| g__norank_f__Steroidobacteraceae        | 3.370 | 3.037 | 0.0495 |
| g__norank_f__JG30-KF-CM45               | 3.881 | 3.280 | 0.0495 |

**Supplementary Table S8.** LEfSe analysis of bacterial community in the rhizosphere of alfalfa under Control and MJM-5+LJL-12 and the bacterial taxa were significantly enriched in the MJM-5+LJL-12 treatment.

| Species                                    | Mean  | LDA value | P value |
|--------------------------------------------|-------|-----------|---------|
| p__Actinobacteriota                        | 5.435 | 5.024     | 0.0495  |
| c__Actinobacteria                          | 5.115 | 4.713     | 0.0495  |
| p__Acidobacteriota                         | 5.165 | 4.689     | 0.0495  |
| c__Thermoleophilia                         | 5.030 | 4.517     | 0.0495  |
| c__Vicinamibacteria                        | 4.876 | 4.424     | 0.0495  |
| o__Vicinamibacteriales                     | 4.863 | 4.413     | 0.0495  |
| p__Chloroflexi                             | 4.920 | 4.409     | 0.0495  |
| o__Burkholderiales                         | 4.884 | 4.282     | 0.0495  |
| o__Micrococcales                           | 4.582 | 4.269     | 0.0495  |
| o__Gaiellales                              | 4.844 | 4.240     | 0.0495  |
| o__Propionibacteriales                     | 4.579 | 4.230     | 0.0495  |
| g__norank_f__norank_o__Vicinamibacteriales | 4.623 | 4.157     | 0.0495  |
| f__norank_o__Vicinamibacteriales           | 4.623 | 4.143     | 0.0495  |
| f__norank_o__Gaiellales                    | 4.660 | 4.137     | 0.0495  |
| o__Solirubrobacteriales                    | 4.552 | 4.127     | 0.0495  |
| f__Micrococcaceae                          | 4.415 | 4.101     | 0.0495  |
| g__Arthrobacter                            | 4.391 | 4.095     | 0.0495  |
| g__norank_f__norank_o__Gaiellales          | 4.660 | 4.073     | 0.0495  |
| f__Nocardiodaceae                          | 4.424 | 4.072     | 0.0495  |
| f__Vicinamibacteraceae                     | 4.457 | 4.060     | 0.0495  |
| g__Nocardioidea                            | 4.378 | 4.048     | 0.0495  |
| c__Chloroflexia                            | 4.427 | 4.027     | 0.0495  |
| f__Comamonadaceae                          | 4.424 | 3.984     | 0.0495  |
| g__norank_f__Vicinamibacteraceae           | 4.349 | 3.962     | 0.0495  |

|                                            |       |       |        |
|--------------------------------------------|-------|-------|--------|
| o__Frankiales                              | 4.322 | 3.950 | 0.0495 |
| c__Blastocatellia                          | 4.498 | 3.911 | 0.0495 |
| g__norank_f__Gemmatimonadaceae             | 4.365 | 3.885 | 0.0495 |
| g__unclassified_f__Comamonadaceae          | 4.168 | 3.847 | 0.0495 |
| f__Xanthobacteraceae                       | 4.473 | 3.847 | 0.0495 |
| c__Acidimicrobiia                          | 4.227 | 3.843 | 0.0495 |
| f__Solirubrobacteraceae                    | 4.223 | 3.832 | 0.0495 |
| p__Myxococcota                             | 4.349 | 3.823 | 0.0495 |
| f__67-14                                   | 4.270 | 3.817 | 0.0495 |
| c__KD4-96                                  | 4.234 | 3.807 | 0.0495 |
| g__Gaiella                                 | 4.367 | 3.805 | 0.0495 |
| g__norank_f__67-14                         | 4.270 | 3.804 | 0.0495 |
| g__norank_f__norank_o__norank_c__KD4-96    | 4.234 | 3.804 | 0.0495 |
| f__norank_o__norank_c__KD4-96              | 4.234 | 3.800 | 0.0495 |
| f__Geodermatophilaceae                     | 4.171 | 3.799 | 0.0495 |
| c__Acidobacteriae                          | 4.333 | 3.791 | 0.0495 |
| g__RB41                                    | 4.379 | 3.774 | 0.0495 |
| f__Gaiellaceae                             | 4.367 | 3.771 | 0.0495 |
| p__Planctomycetota                         | 4.545 | 3.771 | 0.0495 |
| o__norank_c__KD4-96                        | 4.234 | 3.760 | 0.0495 |
| g__Solirubrobacter                         | 4.067 | 3.736 | 0.0495 |
| o__Pyrinomonadales                         | 4.379 | 3.731 | 0.0495 |
| g__Blastococcus                            | 4.115 | 3.714 | 0.0495 |
| o__Thermomicrobiales                       | 4.143 | 3.711 | 0.0495 |
| f__Pyrinomonadaceae                        | 4.379 | 3.689 | 0.0495 |
| o__Chloroflexales                          | 4.080 | 3.683 | 0.0495 |
| f__Propionibacteriaceae                    | 4.055 | 3.682 | 0.0495 |
| g__norank_f__norank_o__norank_c__MB-A2-108 | 4.154 | 3.677 | 0.0495 |
| f__norank_o__norank_c__MB-A2-108           | 4.154 | 3.672 | 0.0495 |
| c__MB-A2-108                               | 4.154 | 3.662 | 0.0495 |
| c__Polyangia                               | 4.014 | 3.661 | 0.0495 |
| g__Bacillus                                | 4.081 | 3.661 | 0.0495 |
| g__Microlunatus                            | 4.051 | 3.661 | 0.0495 |
| g__Streptomyces                            | 4.081 | 3.652 | 0.0495 |
| o__norank_c__MB-A2-108                     | 4.154 | 3.651 | 0.0495 |
| f__Streptomycetaceae                       | 4.083 | 3.650 | 0.0495 |
| o__Microtrichales                          | 3.972 | 3.649 | 0.0495 |
| f__JG30-KF-CM45                            | 4.082 | 3.647 | 0.0495 |
| f__Roseiflexaceae                          | 4.056 | 3.645 | 0.0495 |
| g__norank_f__Roseiflexaceae                | 4.040 | 3.643 | 0.0495 |
| p__unclassified_k__norank_d__Bacteria      | 4.110 | 3.642 | 0.0495 |
| o__Streptomycetales                        | 4.083 | 3.638 | 0.0495 |
| g__Microvirga                              | 3.937 | 3.634 | 0.0495 |
| c__Planctomycetes                          | 4.331 | 3.631 | 0.0495 |
| f__Oxalobacteraceae                        | 3.983 | 3.629 | 0.0495 |
| g__norank_f__JG30-KF-CM45                  | 4.082 | 3.628 | 0.0495 |
| c__unclassified_k__norank_d__Bacteria      | 4.110 | 3.609 | 0.0495 |
| g__unclassified_k__norank_d__Bacteria      | 4.110 | 3.602 | 0.0495 |
| f__unclassified_k__norank_d__Bacteria      | 4.110 | 3.597 | 0.0495 |
| o__unclassified_k__norank_d__Bacteria      | 4.110 | 3.596 | 0.0495 |
| c__Anaerolineae                            | 4.119 | 3.588 | 0.0495 |
| g__Sphingobium                             | 3.769 | 3.561 | 0.0495 |

|                                                       |       |       |        |
|-------------------------------------------------------|-------|-------|--------|
| f__Intrasporangiaceae                                 | 3.867 | 3.529 | 0.0495 |
| f__Ilumatobacteraceae                                 | 3.816 | 3.513 | 0.0495 |
| f__Nitrosomonadaceae                                  | 4.186 | 3.510 | 0.0495 |
| g__Lysobacter                                         | 3.926 | 3.502 | 0.0495 |
| c__TK10                                               | 3.973 | 3.501 | 0.0495 |
| f__norank_o__norank_c__TK10                           | 3.973 | 3.499 | 0.0495 |
| o__norank_c__TK10                                     | 3.973 | 3.498 | 0.0495 |
| g__norank_f__norank_o__norank_c__TK10                 | 3.973 | 3.462 | 0.0495 |
| f__Anaerolineaceae                                    | 3.865 | 3.462 | 0.0495 |
| g__Bryobacter                                         | 3.809 | 3.445 | 0.0495 |
| f__Bryobacteraceae                                    | 3.809 | 3.444 | 0.0495 |
| f__Steroidobacteraceae                                | 3.756 | 3.435 | 0.0495 |
| o__Anaerolineales                                     | 3.865 | 3.435 | 0.0495 |
| o__Bryobacteriales                                    | 3.809 | 3.434 | 0.0495 |
| f__Micromonosporaceae                                 | 3.916 | 3.432 | 0.0495 |
| o__Steroidobacteriales                                | 3.760 | 3.425 | 0.0495 |
| o__Micromonosporales                                  | 3.916 | 3.414 | 0.0495 |
| g__norank_f__Xanthobacteraceae                        | 4.053 | 3.405 | 0.0495 |
| g__norank_f__norank_o__Subgroup_7                     | 3.889 | 3.403 | 0.0495 |
| g__Nitrospira                                         | 3.892 | 3.394 | 0.0495 |
| c__Holophagae                                         | 3.889 | 3.393 | 0.0495 |
| o__Subgroup_7                                         | 3.889 | 3.389 | 0.0495 |
| g__Subgroup_10                                        | 3.702 | 3.385 | 0.0495 |
| o__Gammaproteobacteria_Incertae_Sedis                 | 3.776 | 3.385 | 0.0495 |
| f__Microbacteriaceae                                  | 3.667 | 3.377 | 0.0495 |
| o__Nitrospirales                                      | 3.892 | 3.373 | 0.0495 |
| f__norank_o__Subgroup_7                               | 3.889 | 3.371 | 0.0495 |
| f__unclassified_o__Gammaproteobacteria_Incertae_Sedis | 3.776 | 3.371 | 0.0495 |
| c__Thermoanaerobaculia                                | 3.702 | 3.363 | 0.0495 |
| o__Azospirillales                                     | 3.804 | 3.361 | 0.0495 |
| o__Thermoanaerobaculales                              | 3.702 | 3.359 | 0.0495 |
| p__Nitrospirota                                       | 3.893 | 3.358 | 0.0495 |
| g__Acidibacter                                        | 3.755 | 3.357 | 0.0495 |
| f__Gemmataceae                                        | 3.895 | 3.352 | 0.0495 |
| g__norank_f__WD2101_soil_group                        | 4.038 | 3.352 | 0.0495 |
| f__Thermoanaerobaculaceae                             | 3.702 | 3.344 | 0.0495 |
| g__unclassified_f__Vicinamibacteraceae                | 3.735 | 3.332 | 0.0495 |
| o__Pseudonocardiales                                  | 3.755 | 3.328 | 0.0495 |
| o__Tepidisphaerales                                   | 4.055 | 3.328 | 0.0495 |
| c__Nitrospira                                         | 3.892 | 3.326 | 0.0495 |
| o__Gemmatales                                         | 3.895 | 3.325 | 0.0495 |
| o__Polyangiales                                       | 3.664 | 3.318 | 0.0495 |
| g__Ellin6067                                          | 3.866 | 3.317 | 0.0495 |
| o__IMCC26256                                          | 3.778 | 3.311 | 0.0495 |
| f__Pseudonocardiaceae                                 | 3.755 | 3.308 | 0.0495 |
| f__Nitrospiraceae                                     | 3.892 | 3.308 | 0.0495 |
| f__WD2101_soil_group                                  | 4.038 | 3.307 | 0.0495 |
| g__norank_f__Intrasporangiaceae                       | 3.602 | 3.305 | 0.0495 |
| g__norank_f__norank_o__IMCC26256                      | 3.778 | 3.287 | 0.0495 |
| f__unclassified_p__Actinobacteriota                   | 2.245 | 3.287 | 0.0369 |
| o__Haliangiales                                       | 3.673 | 3.269 | 0.0495 |
| f__Haliangiaceae                                      | 3.673 | 3.269 | 0.0495 |

|                                              |       |       |        |
|----------------------------------------------|-------|-------|--------|
| f__norank_o__IMCC26256                       | 3.778 | 3.265 | 0.0495 |
| g__Haliangium                                | 3.673 | 3.261 | 0.0495 |
| c__Phycisphaerae                             | 4.069 | 3.259 | 0.0495 |
| g__Steriodobacter                            | 3.605 | 3.254 | 0.0495 |
| o__Myxococcales                              | 3.640 | 3.251 | 0.0495 |
| p__Armatimonadota                            | 3.925 | 3.245 | 0.0495 |
| p__Verrucomicrobiota                         | 3.674 | 3.245 | 0.0495 |
| c__Myxococcia                                | 3.640 | 3.242 | 0.0495 |
| o__Solibacterales                            | 3.597 | 3.237 | 0.0495 |
| g__Candidatus_Solibacter                     | 3.597 | 3.231 | 0.0495 |
| c__Verrucomicrobiae                          | 3.668 | 3.231 | 0.0495 |
| g__unclassified_o__Cyanobacteriales          | 1.523 | 3.221 | 0.0369 |
| g__norank_f__norank_o__Micavibrionales       | 2.483 | 3.201 | 0.0463 |
| f__Solibacteraceae                           | 3.597 | 3.200 | 0.0495 |
| f__norank_o__mle1-27                         | 2.386 | 3.198 | 0.0463 |
| g__UTCFX1                                    | 3.573 | 3.196 | 0.0495 |
| g__Sphingomonas                              | 3.617 | 3.195 | 0.0495 |
| f__norank_o__C0119                           | 3.597 | 3.195 | 0.0495 |
| g__Massilia                                  | 3.503 | 3.190 | 0.0495 |
| p__Cyanobacteria                             | 3.702 | 3.190 | 0.0495 |
| g__norank_f__norank_o__C0119                 | 3.597 | 3.188 | 0.0495 |
| o__C0119                                     | 3.597 | 3.187 | 0.0495 |
| g__Pseudonocardia                            | 3.580 | 3.179 | 0.0495 |
| g__unclassified_f__Gemmatimonadaceae         | 3.620 | 3.151 | 0.0495 |
| f__Rhizobiales_Incertae_Sedis                | 3.639 | 3.146 | 0.0495 |
| f__Myxococcaceae                             | 3.546 | 3.138 | 0.0495 |
| f__unclassified_c__Polyangia                 | 1.523 | 3.136 | 0.0369 |
| g__Agromyces                                 | 3.409 | 3.136 | 0.0495 |
| g__unclassified_f__Oxalobacteraceae          | 3.518 | 3.136 | 0.0495 |
| g__unclassified_c__Polyangia                 | 1.523 | 3.133 | 0.0369 |
| g__Conexibacter                              | 3.601 | 3.132 | 0.0495 |
| g__norank_f__norank_o__norank_c__Gitt-GS-136 | 3.642 | 3.124 | 0.0495 |
| g__Ilumatobacter                             | 3.390 | 3.119 | 0.0495 |
| f__unclassified_o__Bacillales                | 3.482 | 3.115 | 0.0495 |
| g__unclassified_o__Bacillales                | 3.482 | 3.106 | 0.0495 |
| o__norank_c__Gitt-GS-136                     | 3.642 | 3.089 | 0.0495 |
| g__norank_f__Gemmataceae                     | 3.638 | 3.088 | 0.0495 |
| f__norank_o__norank_c__Gitt-GS-136           | 3.642 | 3.088 | 0.0495 |
| g__Candidatus_Ovatusbacter                   | 2.035 | 3.085 | 0.0369 |
| g__norank_f__Chitinophagaceae                | 3.534 | 3.082 | 0.0495 |
| f__Rubrobacteriaceae                         | 3.530 | 3.082 | 0.0495 |
| f__Nakamurellaceae                           | 2.809 | 3.079 | 0.0495 |
| g__Noviherbaspirillum                        | 3.412 | 3.079 | 0.0495 |
| g__Pelomonas                                 | 2.788 | 3.068 | 0.0369 |
| g__Rubrobacter                               | 3.530 | 3.068 | 0.0495 |
| o__unclassified_c__Polyangia                 | 1.523 | 3.059 | 0.0369 |
| g__Roseisolibacter                           | 3.478 | 3.058 | 0.0495 |
| g__Tepidisphaera                             | 1.630 | 3.058 | 0.0369 |
| g__norank_f__Ilumatobacteraceae              | 3.391 | 3.053 | 0.0495 |
| c__Rubrobacteria                             | 3.530 | 3.052 | 0.0495 |
| c__Gitt-GS-136                               | 3.642 | 3.049 | 0.0495 |
| g__Tundrisphaera                             | 1.630 | 3.049 | 0.0369 |



|                                       |       |       |        |
|---------------------------------------|-------|-------|--------|
| g__unclassified_f__Micromonosporaceae | 3.494 | 3.049 | 0.0495 |
| o__Rubrobacterales                    | 3.530 | 3.042 | 0.0495 |
| g__Nordella                           | 3.490 | 3.041 | 0.0495 |
| g__MND1                               | 3.739 | 3.040 | 0.0495 |
| o__mle1-27                            | 2.386 | 3.019 | 0.0463 |
| f__norank_o__Frankiales               | 3.314 | 3.018 | 0.0495 |
| g__norank_f__norank_o__Frankiales     | 3.314 | 3.017 | 0.0495 |
| f__unclassified_o__Vicinamibacterales | 3.378 | 3.013 | 0.0495 |
| f__unclassified_o__Cyanobacterales    | 1.523 | 3.011 | 0.0369 |
| g__unclassified_o__Vicinamibacterales | 3.378 | 3.000 | 0.0495 |

**Supplementary Table S9.** Growth-promoting traits of plant growth promoting rhizobacteria (PGPR) in this study.

| Tested trait                                                                            | LJL-12          | MJM-5            |
|-----------------------------------------------------------------------------------------|-----------------|------------------|
| Phosphate solubilization ( $\mu\text{g}\cdot\text{mL}^{-1}$ )                           | $275.3 \pm 6.1$ | $281.3 \pm 24.0$ |
| ACCD activity ( $\mu\text{mol}\cdot\alpha\text{-KA}\cdot\text{mg}^{-1}\text{ h}^{-1}$ ) | $16.4 \pm 1.9$  | $17.2 \pm 1.3$   |
| IAA production ( $\mu\text{g}\cdot\text{mL}^{-1}$ )                                     | $10.3 \pm 0.1$  | $8.7 \pm 0.5$    |
| Siderophore (A/Ar)                                                                      | $0.7 \pm 0.01$  | $0.8 \pm 0.02$   |

**Supplementary Table S10.** Correlation analysis between the physio-chemical properties of alfalfa rhizosphere soil and major bacterial taxa under the Control treatment.

| Taxa/Properties     | MC       | BD     | OM     | AN      | AP      | AK      |
|---------------------|----------|--------|--------|---------|---------|---------|
| Actinobacteriota    | 0.663    | 0.749  | 0.018  | 0.994   | -0.995  | 0.990   |
| Proteobacteria      | 0.911    | -0.854 | -0.950 | 0.397   | -0.390  | 0.157   |
| Acidobacteriota     | -0.522   | 0.622  | -0.192 | -0.960  | 0.962   | -0.999* |
| Chloroflexi         | -1.000** | 0.994  | 0.726  | -0.751  | 0.746   | -0.563  |
| Gemmatimonadota     | -0.127   | 0.005  | 0.764  | 0.573   | -0.579  | 0.758   |
| Planctomycetota     | 0.933    | -0.970 | -0.444 | 0.933   | -0.930  | 0.814   |
| Myxococcota         | -0.062   | 0.183  | -0.629 | -0.717  | 0.722   | -0.867  |
| Armatimonadota      | -0.268   | 0.383  | -0.454 | -0.846  | 0.850   | -0.952  |
| Actinobacteria      | 0.683    | -0.766 | -0.009 | 0.997   | -0.997* | 0.986   |
| Gammaproteobacteria | -0.351   | 0.462  | -0.375 | -0.889  | 0.893   | -0.975  |
| Alphaproteobacteria | 0.589    | -0.683 | 0.112  | 0.979   | -0.981  | 0.999*  |
| Thermolephilia      | 0.688    | -0.771 | -0.017 | 0.997*  | -0.998* | 0.985   |
| Vicinamibacteria    | -0.674   | 0.759  | -0.003 | -0.996  | 0.996   | -0.988  |
| Gemmatimonadetes    | -0.052   | -0.070 | 0.713  | 0.633   | -0.639  | 0.805   |
| Arthrobacter        | -0.998*  | 0.983  | 0.778  | -0.697  | 0.691   | -0.497  |
| Sphingomonas        | 0.645    | -0.733 | 0.041  | 0.991   | -0.992  | 0.993   |
| Bacillus            | -0.785   | 0.854  | 0.159  | -0.998* | 0.997*  | -0.949  |
| Streptomyces        | 0.921    | -0.962 | -0.416 | 0.943   | -0.941  | 0.831   |
| Bradyrhizobium      | 0.987    | -0.960 | -0.836 | 0.622   | -0.616  | 0.409   |

MC: moisture content. BD: bulk density. OM: organic matter. AN: available nitrogen. AP: available phosphorus. AK: available potassium. The values in the Table represent the correlation coefficient of the Pearson analysis. \*  $P < 0.05$ ; \*\*  $P < 0.01$ .

**Supplementary Table S11.** Correlation analysis between the physio-chemical properties of alfalfa rhizosphere soil and major bacterial taxa under the LJL-12 treatment.

| Taxa/Properties     | MC      | BD     | OM     | AN     | AP      | AK     |
|---------------------|---------|--------|--------|--------|---------|--------|
| Actinobacteriota    | 0.510   | 0.360  | 0.037  | 0.953  | -0.760  | -0.208 |
| Proteobacteria      | -0.962  | 0.381  | -0.715 | -0.899 | 0.104   | -0.523 |
| Acidobacteriota     | 0.999*  | -0.585 | 0.858  | 0.773  | 0.130   | 0.707  |
| Chloroflexi         | 0.995   | -0.540 | 0.829  | 0.807  | 0.076   | 0.667  |
| Gemmatimonadota     | 0.520   | -0.993 | 0.865  | -0.180 | 0.930   | 0.961  |
| Planctomycetota     | 0.270   | 0.590  | -0.223 | 0.842  | -0.903  | -0.454 |
| Myxococcota         | 0.143   | 0.689  | -0.347 | 0.765  | -0.951  | -0.566 |
| Armatimonadota      | 0.157   | -0.873 | 0.610  | -0.539 | 1.000** | 0.785  |
| Actinobacteria      | 0.621   | 0.232  | 0.171  | 0.985  | -0.666  | -0.075 |
| Gammaproteobacteria | -0.837  | 0.087  | -0.473 | -0.989 | 0.397   | -0.244 |
| Alphaproteobacteria | -0.997* | 0.560  | -0.841 | -0.793 | -0.099  | -0.684 |
| Thermolephilia      | 0.487   | 0.385  | 0.011  | 0.945  | -0.777  | -0.233 |
| Vicinamibacteria    | 0.667   | 0.172  | 0.230  | 0.994  | -0.620  | -0.014 |
| Gemmatimonadetes    | 0.455   | -0.981 | 0.825  | -0.253 | 0.955   | 0.938  |
| Arthrobacter        | 0.996   | -0.682 | 0.915  | 0.688  | 0.253   | 0.790  |
| Sphingomonas        | 0.704   | -0.993 | 0.958  | 0.054  | 0.820   | 0.999* |
| Bacillus            | -0.321  | -0.545 | 0.170  | -0.870 | 0.878   | 0.405  |
| Streptomyces        | 0.007   | -0.790 | 0.484  | -0.660 | 0.986   | 0.683  |
| Bradyrhizobium      | -0.345  | -0.524 | 0.145  | -0.882 | 0.866   | 0.382  |

MC: moisture content. BD: bulk density. OM: organic matter. AN: available nitrogen. AP: available phosphorus. AK: available potassium. The values in the Table represent the correlation coefficient of the Pearson analysis. \*  $P < 0.05$ ; \*\*  $P < 0.01$ .

**Supplementary Table S12.** Correlation analysis between the physio-chemical properties of alfalfa rhizosphere soil and major bacterial taxa under the MJM-5 treatment.

| Taxa/Properties     | MC     | BD     | OM     | AN     | AP     | AK     |
|---------------------|--------|--------|--------|--------|--------|--------|
| Actinobacteriota    | -0.464 | -0.381 | 0.992  | -0.732 | 0.060  | 0.551  |
| Proteobacteria      | 0.599  | 0.229  | -0.958 | 0.831  | 0.099  | -0.412 |
| Acidobacteriota     | 0.924  | -0.300 | -0.679 | 0.998* | 0.593  | 0.111  |
| Chloroflexi         | -0.701 | 0.997  | -0.427 | -0.425 | -0.969 | -0.963 |
| Gemmatimonadota     | 0.520  | 0.321  | -0.981 | 0.774  | 0.004  | -0.497 |
| Planctomycetota     | -0.409 | 0.962  | -0.715 | -0.084 | -0.822 | -0.997 |
| Myxococcota         | 0.433  | -0.969 | 0.696  | 0.110  | 0.836  | 0.998* |
| Armatimonadota      | 0.616  | 0.209  | -0.952 | 0.842  | 0.119  | -0.393 |
| Actinobacteria      | -0.809 | 0.068  | 0.832  | -0.958 | -0.388 | 0.125  |
| Gammaproteobacteria | 0.468  | 0.377  | -0.991 | 0.734  | -0.057 | -0.548 |
| Alphaproteobacteria | 0.888  | -0.922 | 0.124  | 0.686  | 0.998* | 0.831  |
| Thermolephilia      | -0.232 | -0.597 | 0.993  | -0.541 | 0.305  | 0.740  |
| Vicinamibacteria    | 0.999* | -0.606 | -0.389 | 0.958  | 0.831  | 0.442  |
| Gemmatimonadetes    | 0.488  | 0.356  | -0.988 | 0.750  | -0.034 | -0.529 |
| Arthrobacter        | -0.912 | 0.271  | 0.700  | -0.996 | -0.569 | -0.081 |
| Sphingomonas        | 0.903  | -0.249 | -0.716 | 0.994  | 0.550  | 0.059  |
| Bacillus            | -0.636 | -0.184 | 0.944  | -0.855 | -0.145 | 0.369  |

|                |       |       |         |       |        |        |
|----------------|-------|-------|---------|-------|--------|--------|
| Streptomyces   | 0.443 | 0.403 | -0.994  | 0.715 | -0.085 | -0.572 |
| Bradyrhizobium | 0.311 | 0.529 | -0.999* | 0.608 | -0.226 | -0.683 |

MC: moisture content. BD: bulk density. OM: organic matter. AN: available nitrogen. AP: available phosphorus. AK: available potassium. The values in the Table represent the correlation coefficient of the Pearson analysis. \*  $P < 0.05$ ; \*\*  $P < 0.01$ .

**Supplementary Table S13.** Correlation analysis between the physio-chemical properties of alfalfa rhizosphere soil and major bacterial taxa under the MJM-5+LJL-12 treatment.

| Taxa/Properties     | MC       | BD     | OM     | AN     | AP       | AK     |
|---------------------|----------|--------|--------|--------|----------|--------|
| Actinobacteriota    | -1.000** | -0.487 | 0.818  | -0.679 | -0.987   | -0.936 |
| Proteobacteria      | 0.700    | -0.285 | -0.160 | 1.000* | 0.805    | 0.906  |
| Acidobacteriota     | -0.893   | -0.039 | 0.469  | -0.937 | -0.953   | -0.994 |
| Chloroflexi         | -0.064   | 0.841  | -0.524 | -0.775 | -0.222   | -0.409 |
| Gemmatimonadota     | 0.534    | 0.998* | -0.924 | -0.256 | 0.393    | 0.205  |
| Planctomycetota     | -0.785   | -0.923 | 0.999* | -0.080 | -0.676   | -0.519 |
| Myxococcota         | -1.000*  | -0.503 | 0.828  | -0.665 | -0.984   | -0.930 |
| Armatimonadota      | 0.746    | 0.944  | -0.994 | 0.019  | 0.631    | 0.467  |
| Actinobacteria      | -0.844   | -0.879 | 0.999* | -0.180 | -0.747   | -0.602 |
| Gammaproteobacteria | 0.780    | -0.168 | -0.276 | 0.989  | 0.870    | 0.950  |
| Alphaproteobacteria | 0.397    | -0.610 | 0.206  | 0.943  | 0.538    | 0.693  |
| Thermolephilia      | 0.235    | 0.964  | -0.753 | -0.553 | 0.077    | -0.120 |
| Vicinamibacteria    | -0.688   | -0.968 | 0.981  | 0.064  | -0.564   | -0.391 |
| Gemmatimonadetes    | 0.547    | 0.997* | -0.930 | -0.241 | 0.407    | 0.220  |
| Arthrobacter        | -0.778   | -0.927 | 0.998* | -0.068 | -0.667   | -0.509 |
| Sphingomonas        | -0.051   | 0.849  | -0.535 | -0.767 | -0.209   | -0.397 |
| Bacillus            | 0.477    | -0.537 | 0.117  | 0.969  | 0.611    | 0.754  |
| Streptomyces        | -0.986   | -0.334 | 0.710  | -0.792 | -1.000** | -0.982 |
| Bradyrhizobium      | -0.383   | 0.622  | -0.220 | -0.938 | -0.526   | -0.682 |

MC: moisture content. BD: bulk density. OM: organic matter. AN: available nitrogen. AP: available phosphorus. AK: available potassium. The values in the Table represent the correlation coefficient of the Pearson analysis. \*  $P < 0.05$ ; \*\*  $P < 0.01$ .
